# Supplementary material for: Isolation and characterisation of ΦcrAss002, a crAss-like phage from the human gut that infects Bacteroides xylanisolvens
Source: PubMed Central journal article supplement (PMC8042965; doi:10.1186/s40168-021-01036-7), 2021-04-12

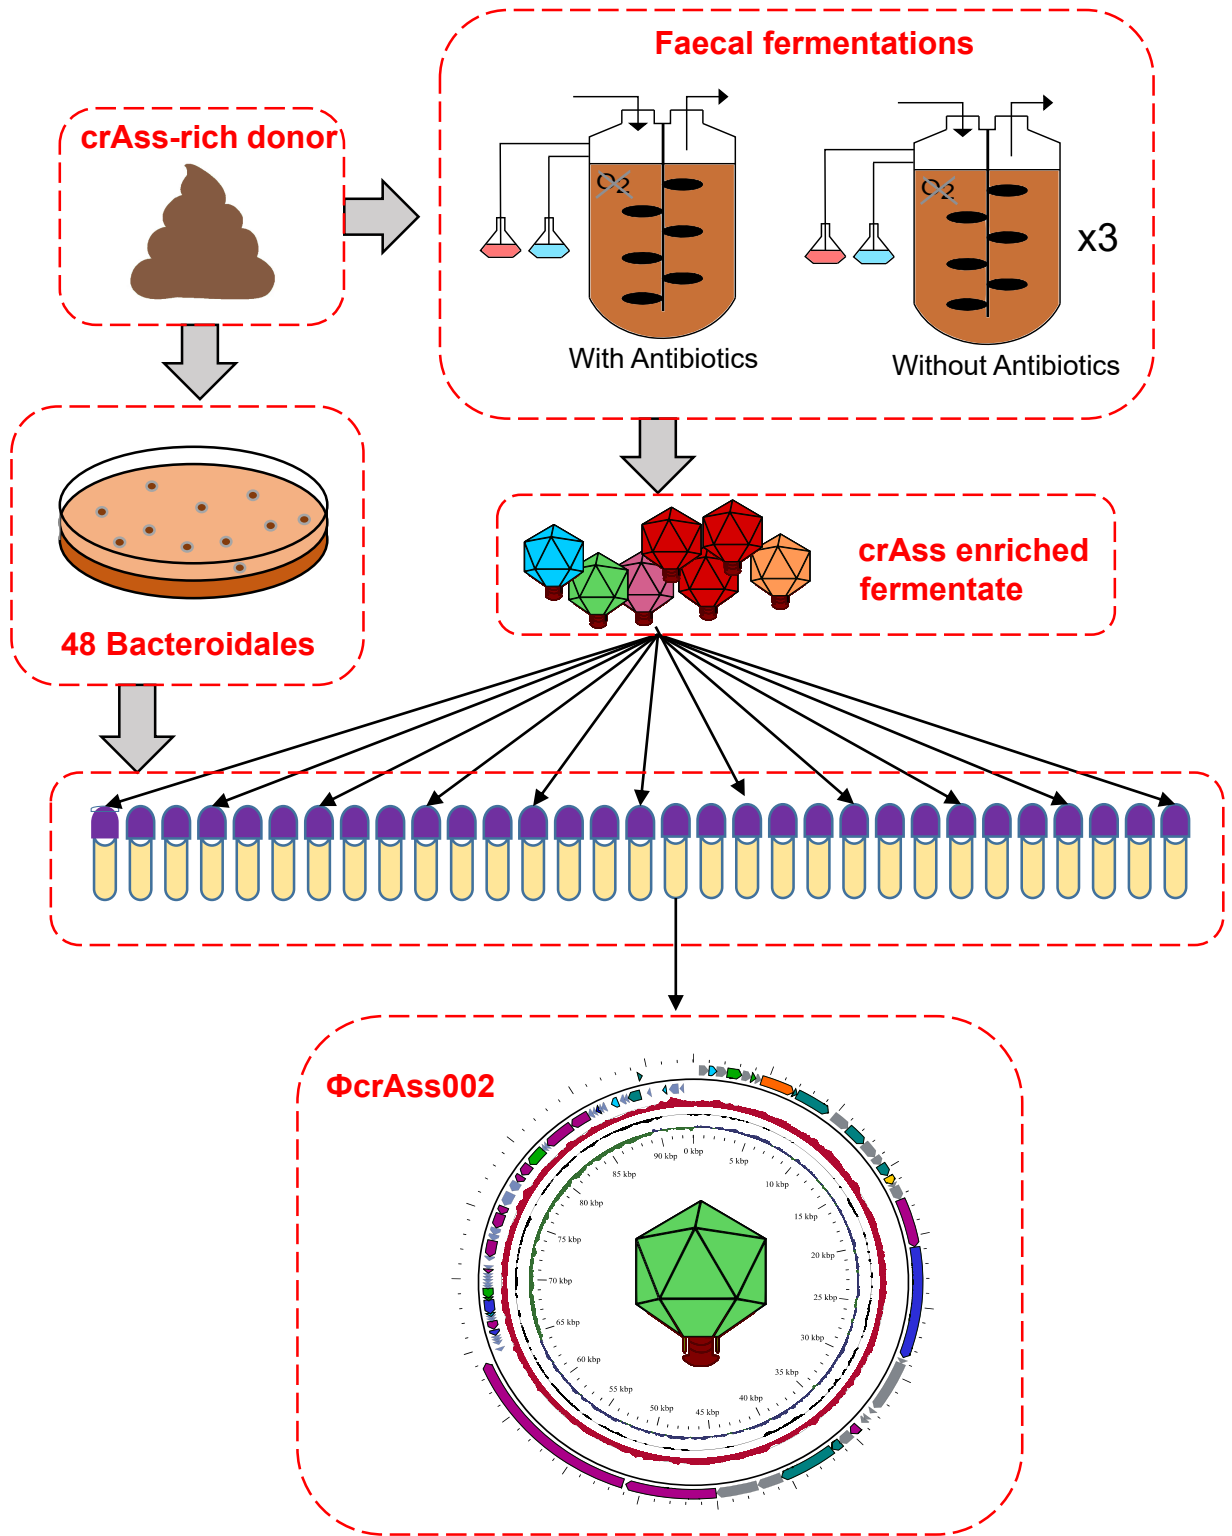

Supplement: 40168_2021_1036_MOESM2_ESM.pdf [file 40168_2021_1036_MOESM2_ESM.pdf]
