# Supplementary material for: Isolation and characterisation of ΦcrAss002, a crAss-like phage from the human gut that infects Bacteroides xylanisolvens
Source: PubMed Central journal article supplement (PMC8042965; doi:10.1186/s40168-021-01036-7), 2021-04-12

- With Antibiotics
- No Antibiotics

**a**

**Bacteriome**  
Mean Alpha-Diversity

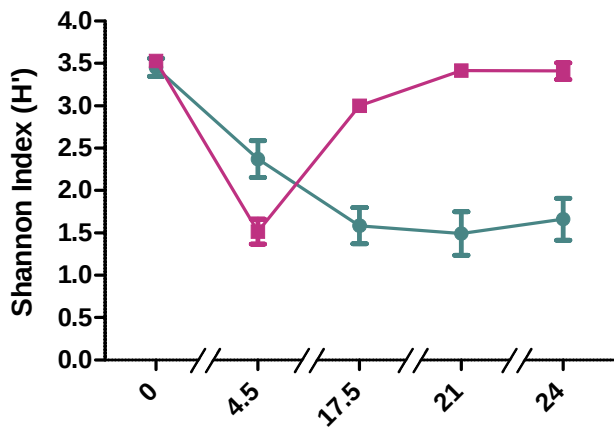

**b**

**Virome**  
Mean Alpha-Diversity

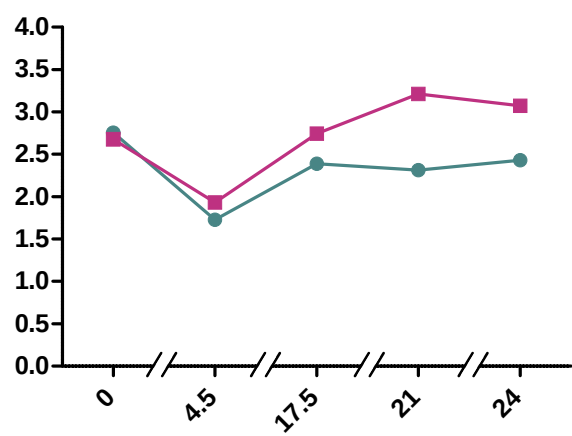

Pielou's Evenness ( $J = H'/\ln(S)$ )

Mean Evenness

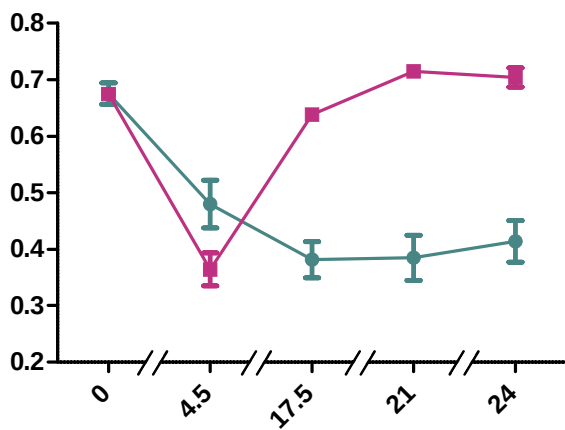

Mean Evenness

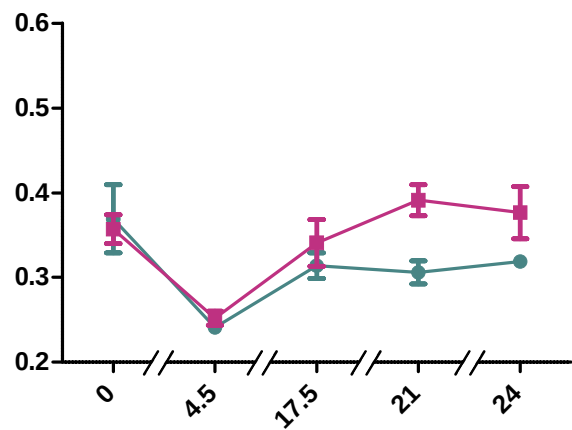

Mean Richness

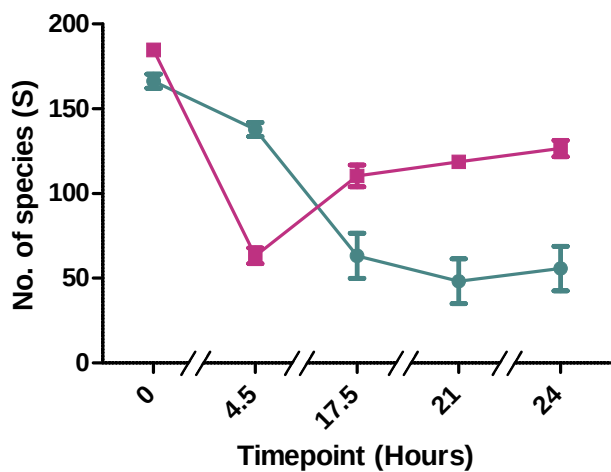

Mean Richness

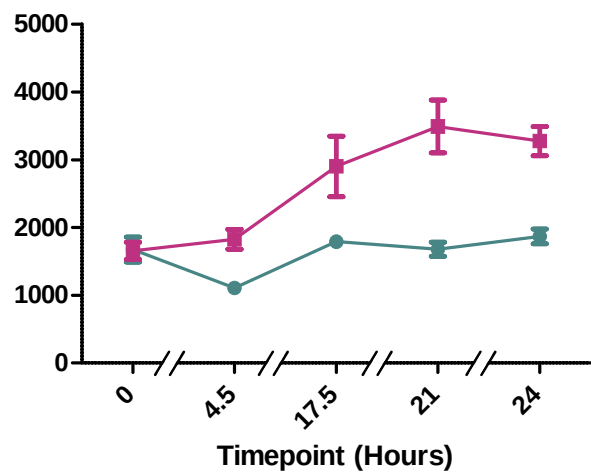

Supplement: 40168_2021_1036_MOESM3_ESM.pdf [file 40168_2021_1036_MOESM3_ESM.pdf]
