# Supplementary material for: Isolation and characterisation of ΦcrAss002, a crAss-like phage from the human gut that infects Bacteroides xylanisolvens
Source: PubMed Central journal article supplement (PMC8042965; doi:10.1186/s40168-021-01036-7), 2021-04-12

**a**

- Negative stranded CDS
- Positive stranded CDS
- tRNA and rRNA
- Sus gene family
- TonB dependent receptor
- Invertase/Integrase/Recombinase

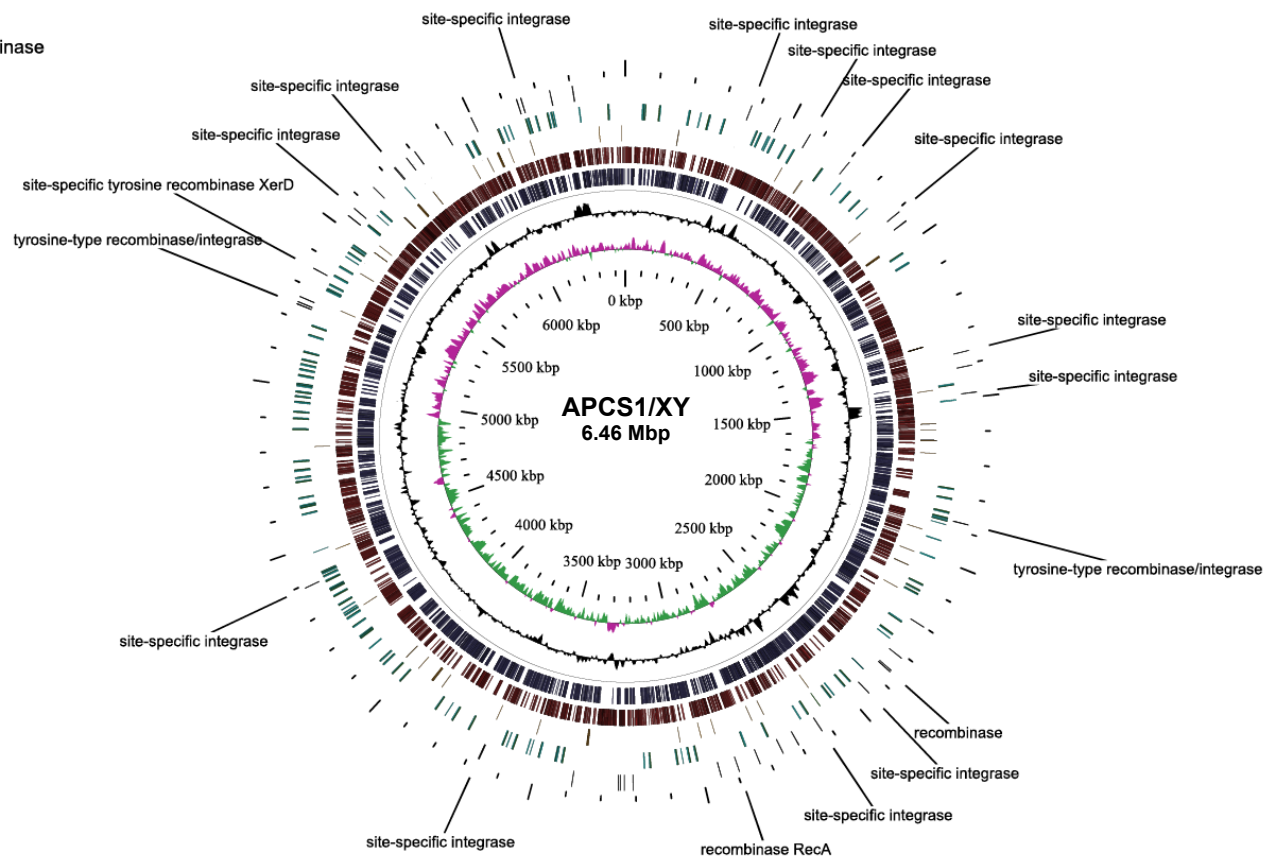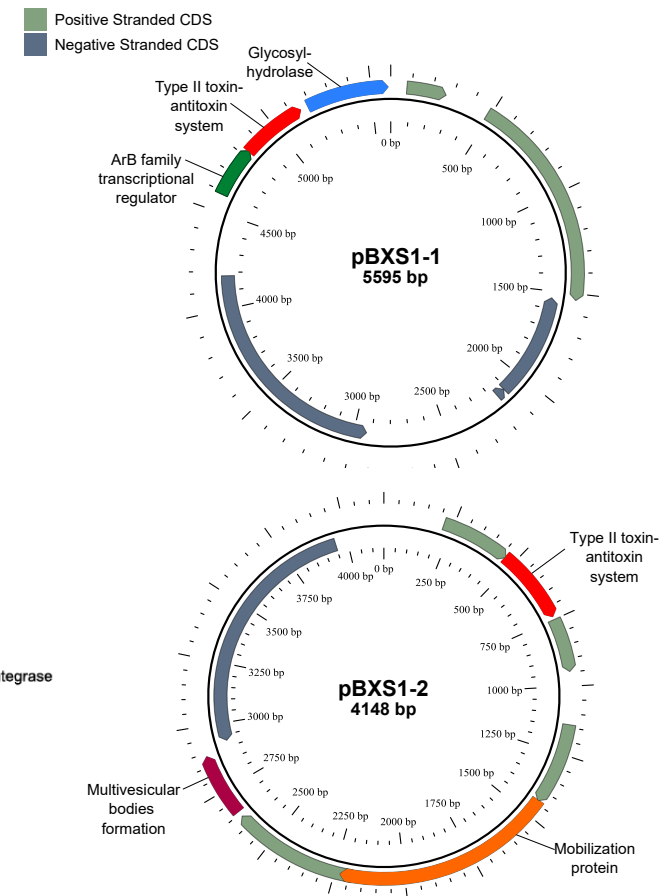**b****Read lengths distribution**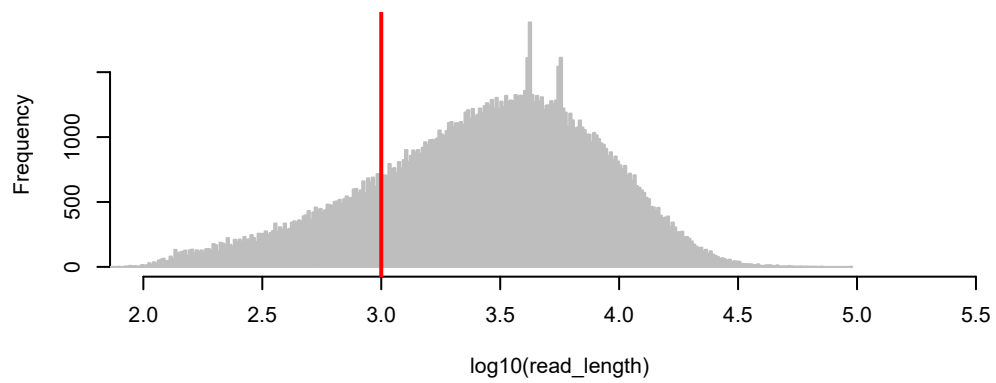**c****BLAST alignment quality**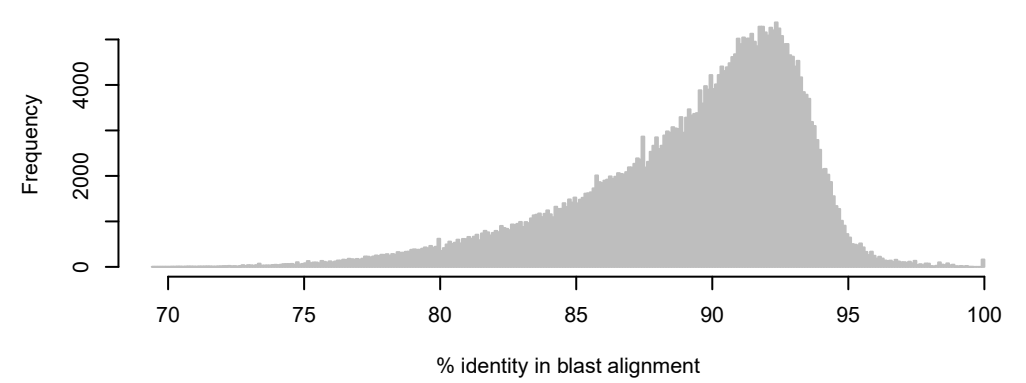**d****Recombination hotspots in individual ONT reads**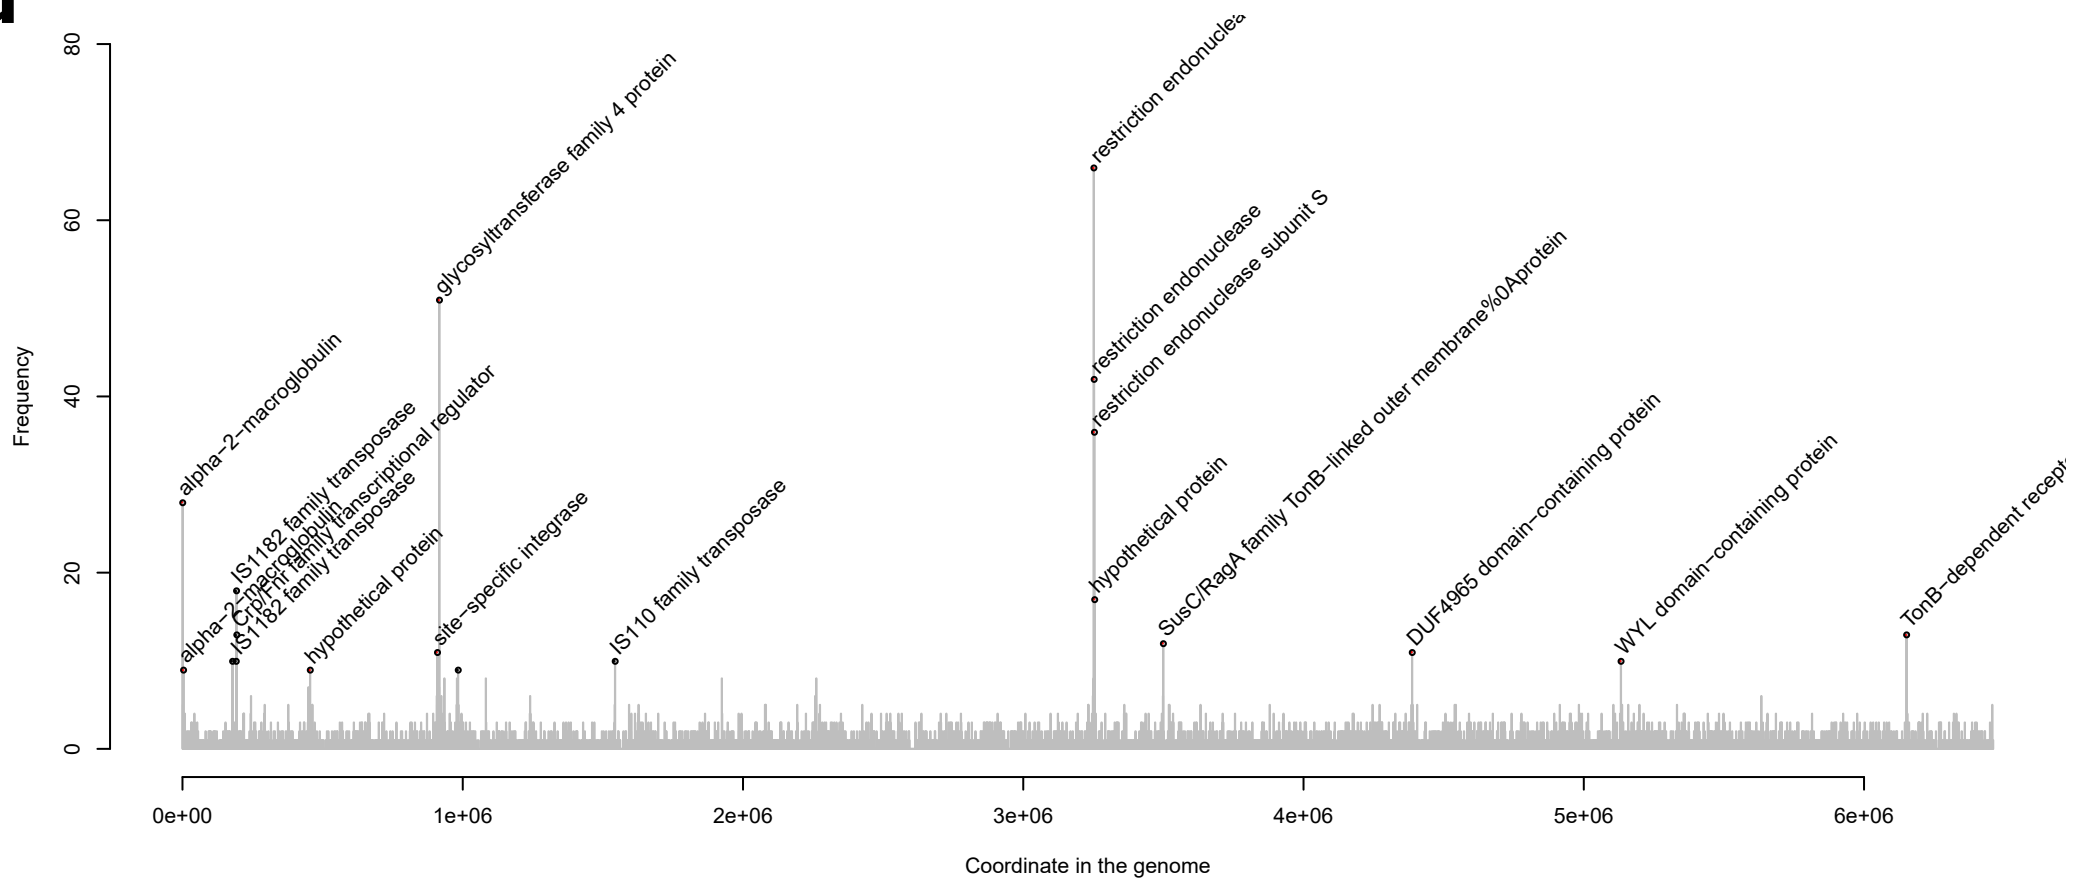

Supplement: 40168_2021_1036_MOESM8_ESM.pdf [file 40168_2021_1036_MOESM8_ESM.pdf]
